# Supplementary material
Source: publisher site journal article supplement (https://www.dovepress.com/article/208030)
Supplement: Supplementary file 1 [file get_supplementary_file.php]

**Supplementary Table 1. Demographics based on Stimulation Sequence.** ^ independent t-test, # chi-square , * statistically significant. BMI: Body Mass Index, BIS/BAS: Behavioral Inhibition System/ Behavioral Activation System Scale, HamD-17: Hamilton Depression Rating Scale, HRV: Heart Rate Variability, LF/HF: ration of Low Frequency to high frequency, Mean RR: Mean time between RR (all R peaks) intervals, Baseline refers to the pre-stimulation measures of session 1.

| **Demographics** | | A-S (n=10) | S-A (n=10) | P-value |
| --- | --- | --- | --- | --- |
| Age | | 43.40(13.63) | 42.60(13.83) | 0.898^ |
| Sex, N(%)  Male  Female | | 3(30%)  7(70%) | 9(90%)  1(1%) | 0.02*# |
| Race, N(%)  Caucasian  African American | | 10(100%)  0(0%) | 8(80%)  2(20%) | 0.474# |
| Ethnicity, N(%)  Hispanic/Latino  Non-Hispanic/Latino | | 0(0%)  10(100%) | 1(10%)  9(90%) | 0.99# |
| BMI | | 25.92(5.06) | 25.96(4.05) | 0.985^ |
| Handedness  Right  Left | | 9(90%)  1(10%) | 9(90%)  1(10%) | 1.00 |
| Time in Pain (years) | | 9.34(7.40) | 4.80(2.97) | 0.089^ |
| Previous Treatment, N(%)  Physical or Aquatic therapy  Opioids  Over the counter medications (e.g., NSAID)  Alternative Treatments (e.g., chiropractor, acupuncture)  Surgery  Counseling, Cognitive Behavioral Therapy  Social support (e.g., chronic pain social group)  Low-impact exercise (e.g., yoga, pilates)  Mindfulness Intervention  Other | | 8(80%)  1(10%)  8(80%)  7(70%)  2(20%)  1(10%)  1(10%)  7(70%)  1(10%)  4(40%) | 5(50%)  3 (30%)  10(100%)  6 (60%)  1(10%)  0(0%)  0(0%)  6(60%)  2(20%)  1(10%) | 0.350  0.582  0.474  1.00  1.00  1.00  1.00  1.00  1.00  0.303 |
| **Self-Report Assessments (Baseline)** | | | | |
| Pre-treatment Opinion on likelihood of pain improvement (0-10 NRS, not likely at all to very likely) | | 3.3(1.42) | 4.2(1.75) | 0.223^ |
| Defense and Veterans Pain Rating Scale  Pain Interference with:  Activity  Sleep  Mood  Stress | | 4.4(1.33)  5.1(2.28)  4.3(2.58)  3.8(1.93)  4.2(2.70) | 4.5(0.71)  4.5(.707)  5.7(2.58)  4.4(1.43)  4.5(1.78) | 0.682^  0.444^  0.241^  0.440^  0.773^ |
| Oswestry Disability Index | | 25.6 (12.03) | 31.44(10.76) | 0.267^ |
| UCLA Activity score | | 6.40(2.41) | 5.40(2.17) | 0.343^ |
| Pain Catastrophizing Scale (PCS) Total  Rumination  Magnification  Helplessness | | 12.90(8.29)  5.0(4.11)  2.5(2.38)  5.4 (3.27) | 17.20(11.08)  6.6(5.44)  3.9(2.60)  6.7(4.06) | 0.339^  0.468^  0.195^  0.441^ |
| Pain Self Efficacy Questionnaire (PSEQ) Total | | 42.4(9.86) | 32.8(12.75) | 0.076^ |
| BIS/BAS Scale  BAS Drive  BAS Fun Seeking  BAS Reward Responsiveness  BIS | | 10.1(2.42)  11.1(2.03)  16.5(1.72)  19.1(2.85) | 10.5(2.42)  12.7(1.64)  18.1(1.91)  21.5(4.95) | 0.716^  0.068^  0.064^  0.200^ |
| State-Trait Anxiety Inventory (STAI-Trait) | | 42.0(3.59) | 44.5(11.45) | 0.603^ |
| Depression and Anxiety Subscale (DASS-21) | | 15.0(11.04) | 16.10(15.91) | 0.859^ |
| **Clinical Assessments (Baseline)** | | | | |
| HAMD-17 | 8.4(3.95) | | 9.4(3.03) | 0.533^ |
| Pressure Pain Threshold (PPT)  Brachioradialis (lb)  Sacroiliac Joint (lb) | 4.29(1.18)  10.40(3.69) | | 5.30(3.15)  7.59(3.65) | 0.359^  0.103^ |
| **HRV Components (Baseline)** | | | | |
| Respiratory Sinus Arrhythmia  (RSA) or High Frequency (HF) | 5.81(.915) | | 5.10(1.76) | 0.276^ |
| Low Frequency (LF) | 4.95(.859) | | 4.71(1.80) | 0.707^ |
| LF/HF | 0.857(0.10) | | 0.93(0.28) | 0.435^ |
| Mean RR | 922.88(203.25) | | 877.10(66.47) | 0.507^ |
| Standard Deviation of RR Intervals (SDNN) | 39.67(24.33) | | 53.45(30.25) | 0.276^ |
| Root Mean Square of Successive Differences (RMSSD) | 30.09(20.32) | | 51.94(46.33) | 0.189^ |

| HRV Metric | ANOVA w/o Age | ANOVA w/ Age |
| --- | --- | --- |
| Respiratory Sinus Arrhythmia  (RSA) or High Frequency (HF) | Condition: F1,35 = 1.01, p =0.32  Session: F1,35 = 0.33, p = 0.57  Sequence F1,35 = 0.66, p = 0.42 | Condition: F1,34 = 0.98, p =0.33  Session: F1,34 = 0.32, p =0.57  Sequence: F1,34 = 0.67, p =0.42  Age: F1,34 = 0.02, p =0.88 |
| Low Frequency (LF) | Condition: F1,35=1.56, p=0.22  Session: F1,35=2.91, p=0.10  Sequence: F1,35 = 1.44, p = 0.24 | Condition: F1,34 = 1.52, p =0.23  Session: F1,34 = 2,84, p =0.10  Sequence: F1,34 = 1.31, p =0.23  Age: F1,34 = 0.20, p =0.66 |
| LF/HF | Condition: F1,35=0.14, p=0.72  Session: F1,35=2.63, p=0.11  Sequence: F1,35 = 0.84, p = 0.37 | Condition: F1,34 = 0.13, p =0.72  Session: F1,34 = 2.58, p =0.12  Sequence: F1,34 = 0.72, p =0.40  Age: F1,34 = 0.46, p =0.51 |
| Mean RR | Condition: F1,35=2.92, p=0.096  Session: F1,35=0.012, p=0.91  Sequence: F1,35=0.11 p=0.74 | Condition: F1,34 = 2.84 p =0.10  Session: F1,34 = 0.012, p =0.91  Sequence: F1,34 = 0.11, p =0.74  Age: F1,34 = 0.00, p =0.99 |
| Standard Deviation of RR Intervals (SDNN) | Condition: F1,35=5.34, p=0.027  Session: F1,35=0.00, p=0.999  Sequence: F1,35=0.29, p=0.59 | Condition: F1,34 = 5.20 p =0.029  Session: F1,34 = 0.00, p =0.999  Sequence: F1,34 = 0.31, p =0.58  Age: F1,34 = 0.045, p =0.834 |
| Root Mean Square of Successive Differences (RMSSD) | Condition: F1,35=2.59, p=0.12  Session: F1,35=0.16, p=0.69  Sequence: F1,35=0.02, p=0.88 | Condition: F1,34 = 2.54 p =0.12  Session: F1,34 = 0.16, p =0.69  Sequence: F1,34 = 0.043, p =0.837  Age: F1,34 = 0.274, p =0.604 |

**Supplementary Table 2:** Comparisons of 2-way repeated measures ANOVA results after controlling for age: Age was separated into 2 categories (18-35, n=7) (36-65, n= 13).

**Supplementary Figure 1.** Scatter plots between ages and HRV components.

**
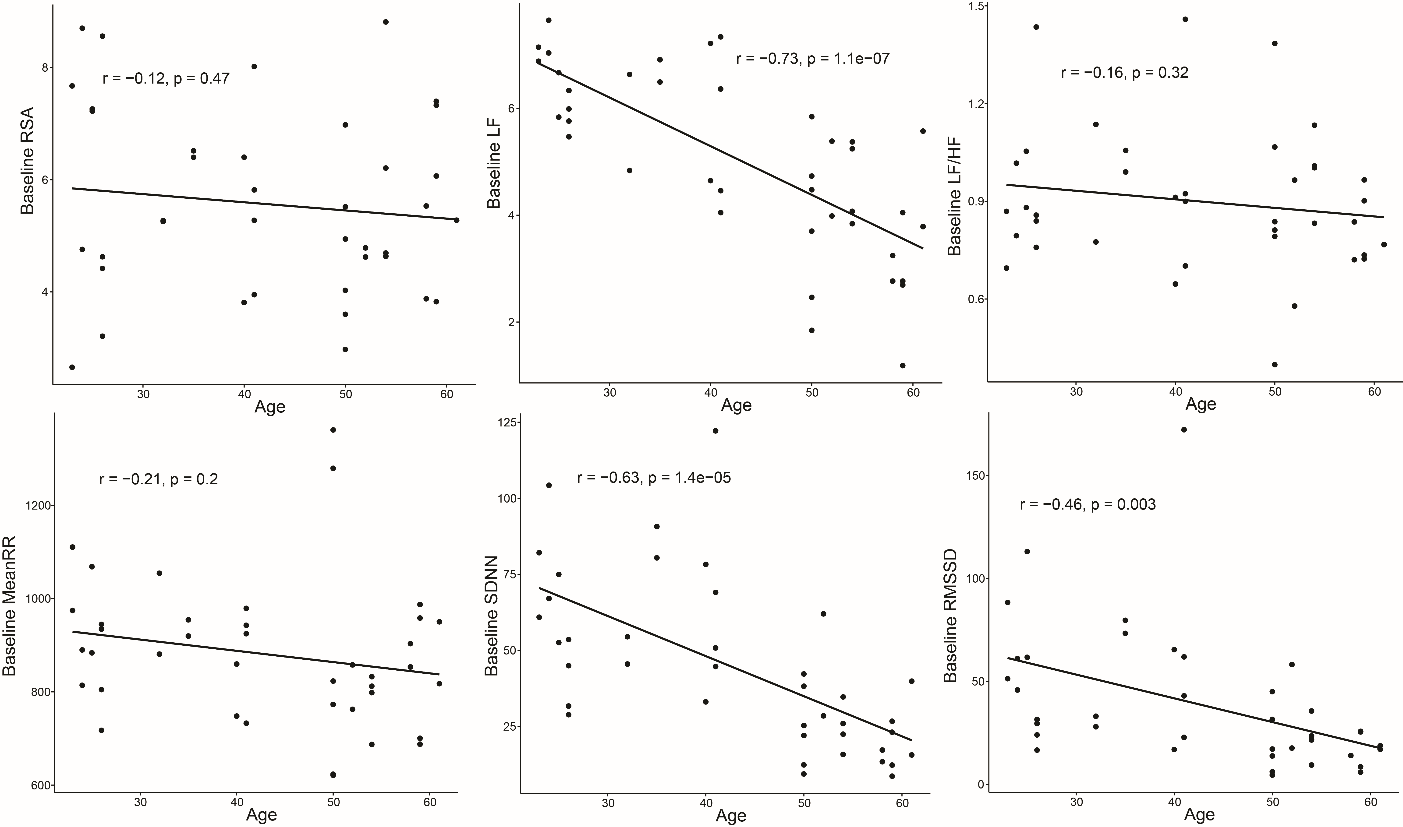
**
